# Supplementary material for: Evaluation of Nitrogen-Corrected Apparent Metabolizable Energy and Standardized Ileal Amino Acid Digestibility of Different Sources of Rice and Rice Milling Byproducts in Broilers
Source: MDPI journal article supplement (doi:10.3390/ani11071894), 2021-06-25
Supplement: s1 [file s1]

**Supplement table 1.** Pearson's correlation assay between chemical composition of rice and its by-products and AMEn of broiler.

| Item   | AMEn     | DM       | CP       | EE       | NDF <sup>1</sup> | ADF <sup>1</sup> | Starch   | Ash     | Ca <sup>2</sup> | P <sup>2</sup> |
|--------|----------|----------|----------|----------|------------------|------------------|----------|---------|-----------------|----------------|
| AMEn   | 1        |          |          |          |                  |                  |          |         |                 |                |
| DM     | 0.638**  | 1        |          |          |                  |                  |          |         |                 |                |
| CP     | -0.861** | -0.708** | 1        |          |                  |                  |          |         |                 |                |
| EE     | -0.824** | -0.715** | 0.971**  | 1        |                  |                  |          |         |                 |                |
| NDF1   | -0.964** | -0.686** | 0.923**  | 0.907**  | 1                |                  |          |         |                 |                |
| ADF1   | -0.975** | -0.679** | 0.931**  | 0.912**  | 0.981**          | 1                |          |         |                 |                |
| Starch | 0.918**  | 0.722**  | -0.985** | -0.963** | -0.954**         | -0.970**         | 1        |         |                 |                |
| Ash    | -0.888** | -0.709** | 0.980**  | 0.967**  | 0.936**          | 0.949**          | -0.990** | 1       |                 |                |
| Ca     | -0.797** | -0.758** | 0.948**  | 0.949**  | 0.884**          | 0.896**          | -0.947** | 0.954** | 1               |                |
| P      | -0.891** | -0.759** | 0.985**  | 0.965**  | 0.947**          | 0.950**          | -0.988** | 0.986** | 0.967**         | 1              |

\* represent significance (p<0.05), \*\* means extremely significant differences (p<0.01).

<sup>1</sup>NDF means neutral detergent fiber, ADF means acid detergent fiber.

<sup>2</sup>Ca represent calcium, P means total phosphorus.

**Supplement table 2.** Basal amino acid losses analysis by NFD method. (%)

| Item             | 14-day-old |      | 28-day-old |      |
|------------------|------------|------|------------|------|
|                  | AA losses  | SD   | AA losses  | SD   |
| Indispensable AA |            |      |            |      |
| Arg              | 0.74       | 0.10 | 0.82       | 0.05 |
| His              | 0.82       | 0.11 | 0.91       | 0.06 |
| Ile              | 0.79       | 0.22 | 0.87       | 0.39 |
| Leu              | 0.83       | 0.15 | 0.91       | 0.27 |
| Lys              | 0.84       | 0.09 | 0.92       | 0.19 |
| Met              | 0.14       | 0.09 | 0.16       | 0.04 |
| Phe              | 0.80       | 0.23 | 0.89       | 0.32 |
| Thr              | 0.80       | 0.29 | 0.87       | 0.15 |
| Trp              | 0.55       | 0.15 | 0.59       | 0.13 |
| Val              | 0.79       | 0.11 | 0.86       | 0.14 |
| Dispensable AA   |            |      |            |      |
| Ala              | 0.71       | 1.01 | 0.84       | 0.59 |
| Asp              | 0.82       | 0.16 | 0.89       | 0.19 |
| Cys              | 0.39       | 0.14 | 0.34       | 0.19 |
| Glu              | 0.85       | 0.12 | 0.92       | 0.09 |
| Gly              | 0.81       | 0.08 | 0.87       | 0.07 |
| Pro              | 0.82       | 0.11 | 0.89       | 0.17 |
| Ser              | 0.79       | 0.58 | 0.89       | 0.17 |
| Tyr              | 0.51       | 0.17 | 0.57       | 0.20 |

Basal amino acid losses analyzed by NFD method in 14-day-old broilers and 28-day-old broilers.

Data were expressed as mean±SD.
